# Supplementary material
Source: Royal Society of Chemistry journal article supplement (doi:10.1039/d5nj04845a)
Supplement: d5nj04845a1.pdf [file d5nj04845a1.pdf]

## Mat Stick–Derived CQD/Fe<sup>3+</sup> Sensor for Ascorbic Acid Detection and Fluorescent Ink Applications

Manjushree Bera<sup>a</sup>, Manik Das,<sup>a, b</sup> Arjina Khatun<sup>b</sup>, Subrata Mukhopadhyay<sup>b</sup>, Bidhan Chandra Samanta<sup>c</sup>, Tithi Maity<sup>a\*</sup>

<sup>a</sup> Department of Chemistry, Natural Science Research Center, Prabhat Kumar College (Vidyasagar University) Contai, Purba Medinipur, India, 721404

<sup>b</sup>Department of Chemistry, Jadavpur University, Jadavpur, Kolkata, West Bengal, India

<sup>c</sup>Department of Chemistry, Mugberia Gangadhar Mahavidyalaya, Purba Medinipur, India

Email: [titlipkc2008@gmail.com](mailto:titlipkc2008@gmail.com)

| Serial Number    | Content                                                                                                                                                                                                                                                                                                                                                                                                                                                                                                                                  | Page |
|------------------|------------------------------------------------------------------------------------------------------------------------------------------------------------------------------------------------------------------------------------------------------------------------------------------------------------------------------------------------------------------------------------------------------------------------------------------------------------------------------------------------------------------------------------------|------|
| <b>Figure S1</b> | Optical colour change of CQDs upon addition of several cations under the UV light ( $\lambda_{\text{max}} = 365 \text{ nm}$ ) (b) Fluorescence intensity change of CQDs at $\lambda_{\text{em}} = 430 \text{ nm}$ after the addition of several cations upon excitation $\lambda_{\text{ex}} = 330 \text{ nm}$ , (c) UV-vis spectral titration graph of CQDs after the gradual addition of Fe(III) ( 1- 15 $\mu\text{M}$ ) (d) Fluometric spectral titration graph of CQDs after the gradual addition of Fe(III) ( 1- 20 $\mu\text{M}$ ) | S3   |
| <b>Figure S2</b> | (a-d) FFT and IFFT images of CQDs with their respective surface profile.                                                                                                                                                                                                                                                                                                                                                                                                                                                                 | S3   |
| <b>Figure S3</b> | Observation of the fluorescence colour of the synthesized CQDs as a function of time under the UV light ( $\lambda_{\text{max}} = 365 \text{ nm}$ ) to investigate the photo stability of the CQDs.                                                                                                                                                                                                                                                                                                                                      | S4   |
| <b>Figure S4</b> | Binding constant determination plot of CQDs/Fe complex.                                                                                                                                                                                                                                                                                                                                                                                                                                                                                  | S4   |
| <b>Figure S5</b> | The Stern-Volmer quenching constant plot of CQDs-Fe(III) adduct.                                                                                                                                                                                                                                                                                                                                                                                                                                                                         | S5   |
| <b>Figure S6</b> | Competitive cation interference plot of CQDs for Fe(III) detection                                                                                                                                                                                                                                                                                                                                                                                                                                                                       | S5   |
| <b>Figure S7</b> | Effect of pH on the fluorescence intensity of the synthesized CQDs and its daughter complexes                                                                                                                                                                                                                                                                                                                                                                                                                                            | S6   |
| <b>Figure S8</b> | The B-H equation plot for the binding constant determination of CQDs/Fe complex with ascorbic acid                                                                                                                                                                                                                                                                                                                                                                                                                                       | S6   |

|                   | at 270 nm.                                                                                                                                                             |     |
|-------------------|------------------------------------------------------------------------------------------------------------------------------------------------------------------------|-----|
| <b>Figure S9</b>  | Change of emission intensity of CQDs/Fe vs concentration of AA plot for the determination of LOD value.                                                                | S7  |
| <b>Figure S10</b> | Time response emission intensity enhancement graph curve for CQDs/Fe(III) during the detection of AA.                                                                  | S7  |
| <b>Figure S11</b> | Competitive biomolecules interference plot of CQDs/Fe complex for the detection of ascorbic acid.                                                                      | S8  |
| <b>Figure S12</b> | Reproducibility confirmation of CQDs/Fe(III) complex during detection of AA, which is monitored by the alternative addition of AA and Fe(III) in the CQDs/Fe solution. | S8  |
| <b>Figure S13</b> | Detection of AA by CQDs/Fe(III) as paper strip (Left side only QCDs, middle QCDs +Fe(III) and right side QCDs +Fe(III))                                                | S9  |
| <b>Figure 14</b>  | EDAX spectra of CQDs/Fe complex with their respective elements. [Inset: table of percentages of elements]                                                              | S9  |
| <b>Figure S15</b> | XPS graph (a) N1s and (b) O1s showing the of binding energy shifting of the donor atoms after coordination with the metal ion                                          | S9  |
| <b>Figure S16</b> | Spectral overlap between FeCl <sub>3</sub> absorption and CQDs emission                                                                                                | S10 |
| <b>Figure S17</b> | The fluorescence lifetime graph of the CQDs before and after the addition of Fe(III) and Ascorbic acid (AA).                                                           | S10 |
| <b>Table S1</b>   | Fluorescence lifetime decay table                                                                                                                                      | S11 |
| <b>Figure S18</b> | Calligraphy works drawing using the CQDs solution as fluorescent ink.                                                                                                  | S11 |

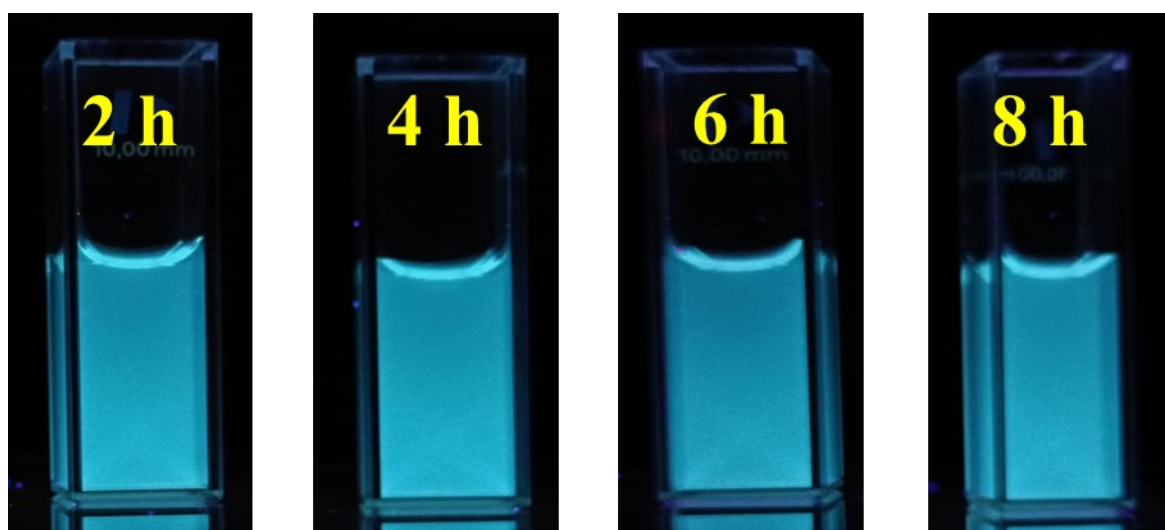

**Figure S1:** Observation of the fluorescence colour of the synthesized CQDs as a function of time under the UV light ( $\lambda_{\max} = 365$  nm) to investigate the photo stability of the CQDs.

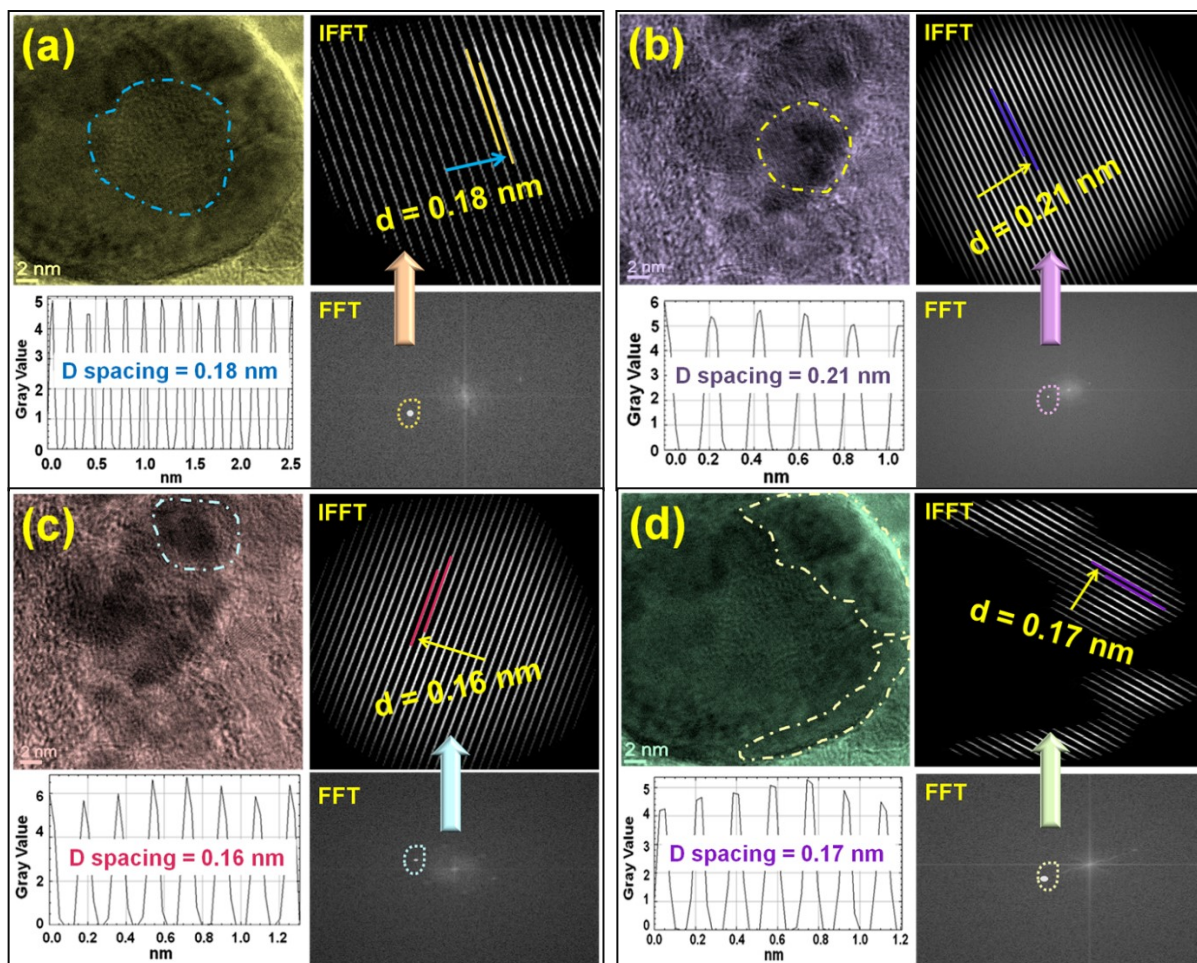

**Figure S2.** (a-d) FFT and IFFT images of CQDs with their respective surface profile.

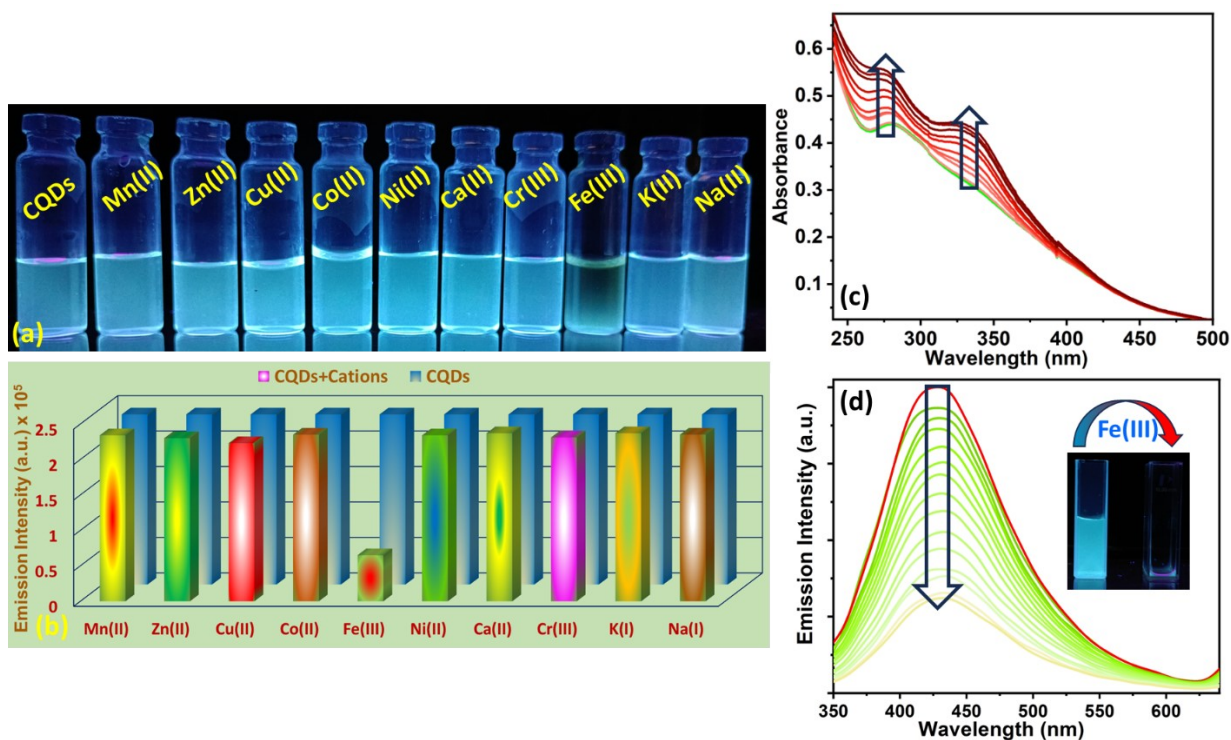

**Figure S3:** (a) Optical colour change of CQDs upon addition of several cations under the UV light ( $\lambda_{\max} = 365$  nm) (b) Fluorescence intensity change of CQDs at  $\lambda_{\text{em}} = 430$  nm after the addition of several cations upon excitation  $\lambda_{\text{ex}} = 330$  nm, (c) UV-vis spectral titration graph of CQDs after the gradual addition of Fe(III) (1- 15  $\mu\text{M}$ ) (d) Fluometric spectral titration graph of CQDs after the gradual addition of Fe(III) (1- 20  $\mu\text{M}$ )

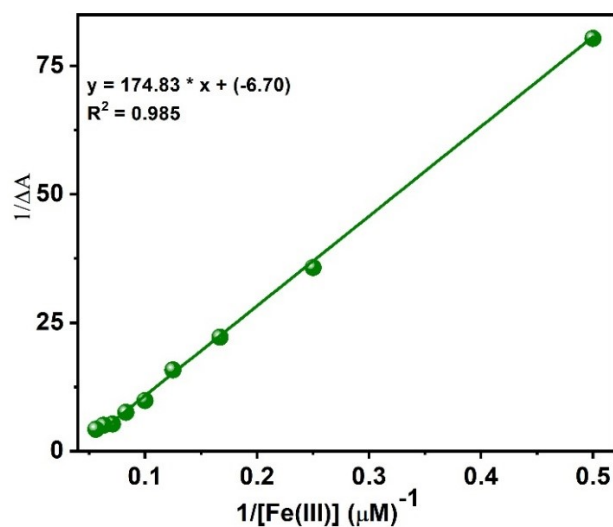

**Figure S4:** Binding constant determination plot of CQDs/Fe complex.

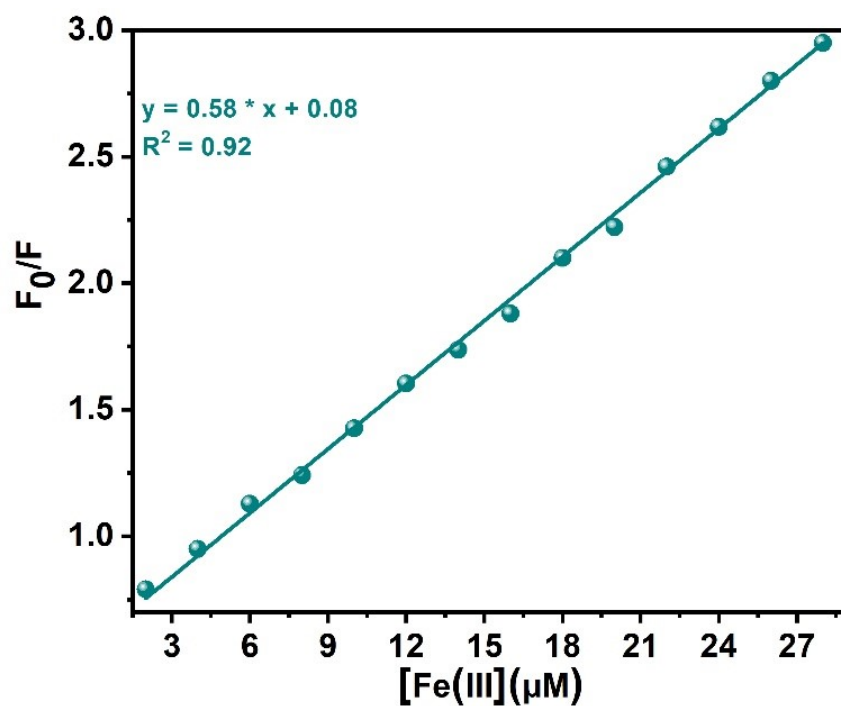

Figure S5: The Stern-Volmer quenching constant plot of CQDs-Fe(III) adduct.

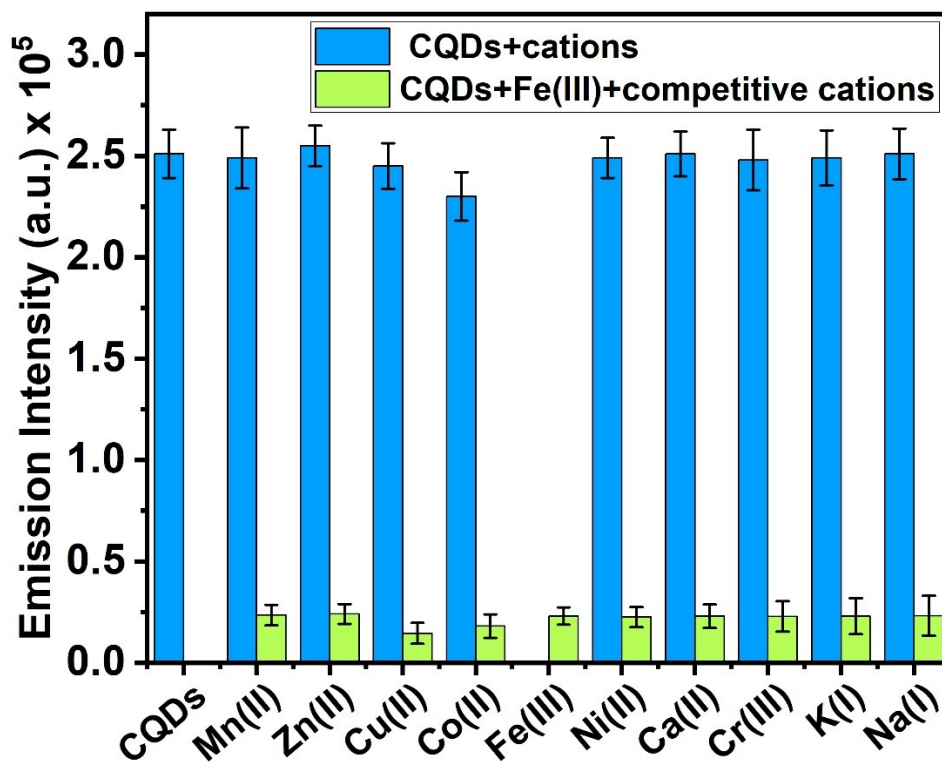

Figure S6: Competitive cation interference plot of CQDs for Fe(III) detection

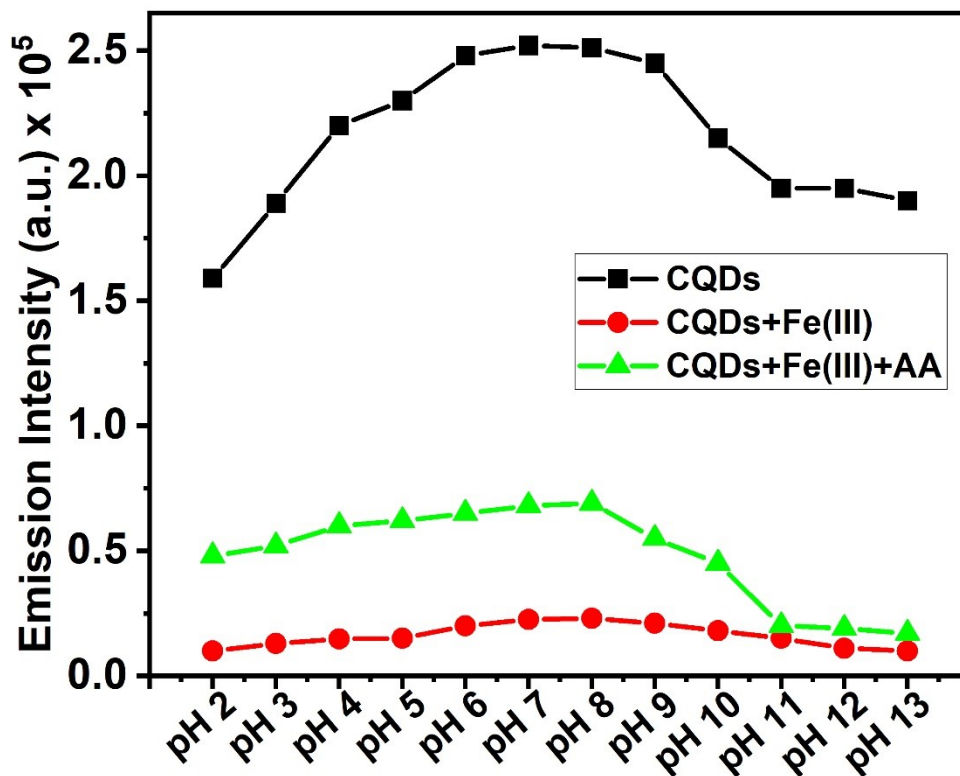

**Figure S7:** Effect of pH on the fluorescence intensity of the synthesized CQDs and its daughter complexes

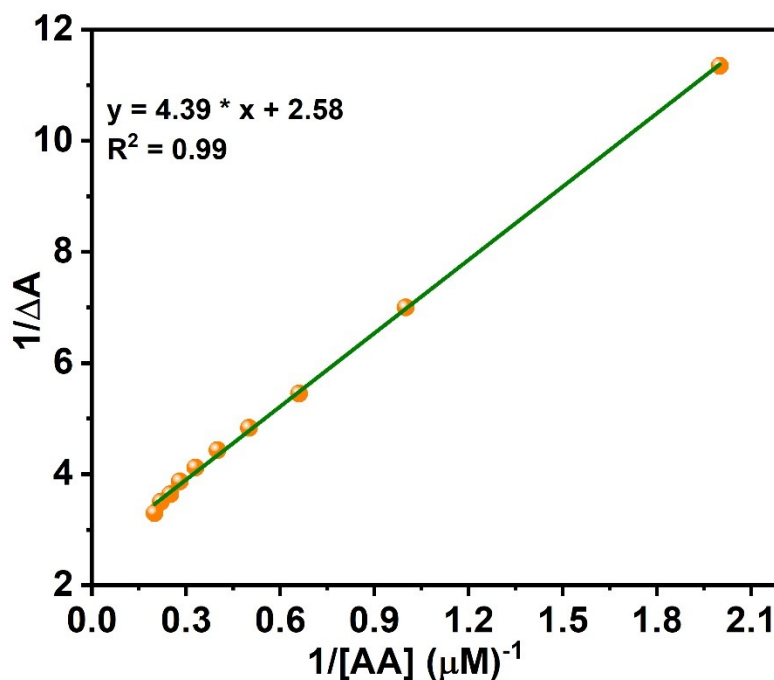

**Figure S8:** The B-H equation plot for the binding constant determination of CQDs/Fe complex with ascorbic acid at 270 nm.

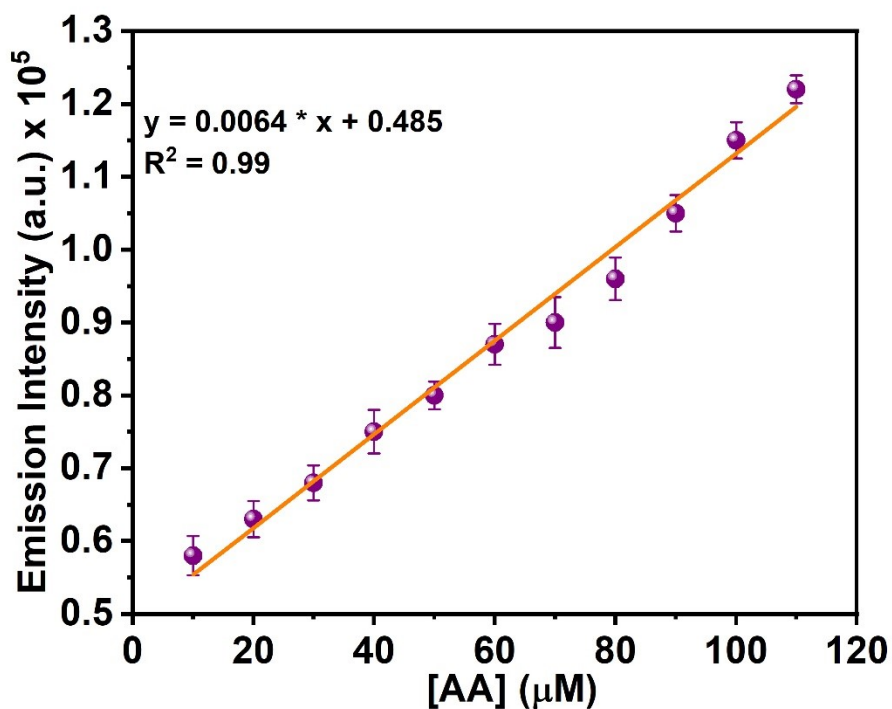

**Figure S9:** Change of emission intensity of CQDs/Fe vs concentration of AA plot for the determination of LOD value.

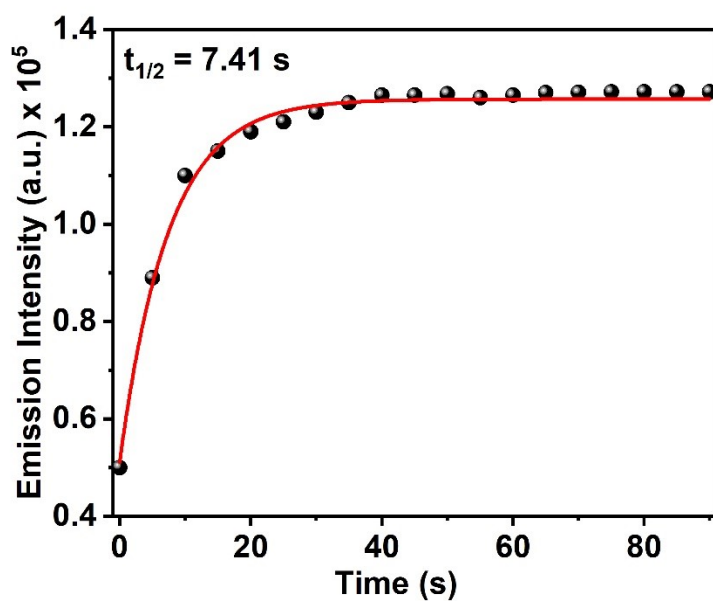

**Figure S10:** Time response emission intensity enhancement graph curve for CQDs/Fe(III) during the detection of AA.

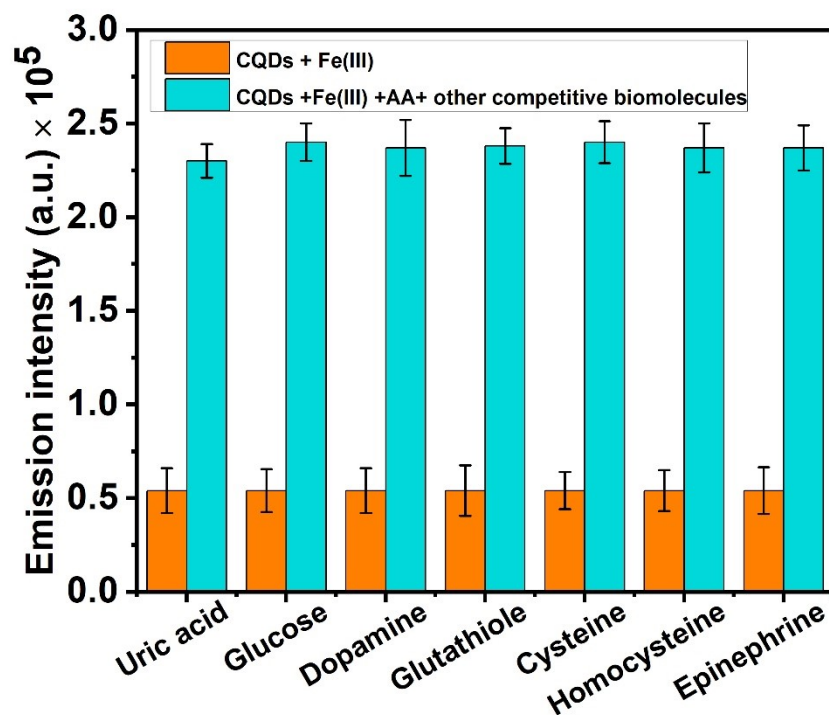

**Figure S11:** Competitive biomolecules interference plot of CQDs/Fe complex for the detection of ascorbic acid.

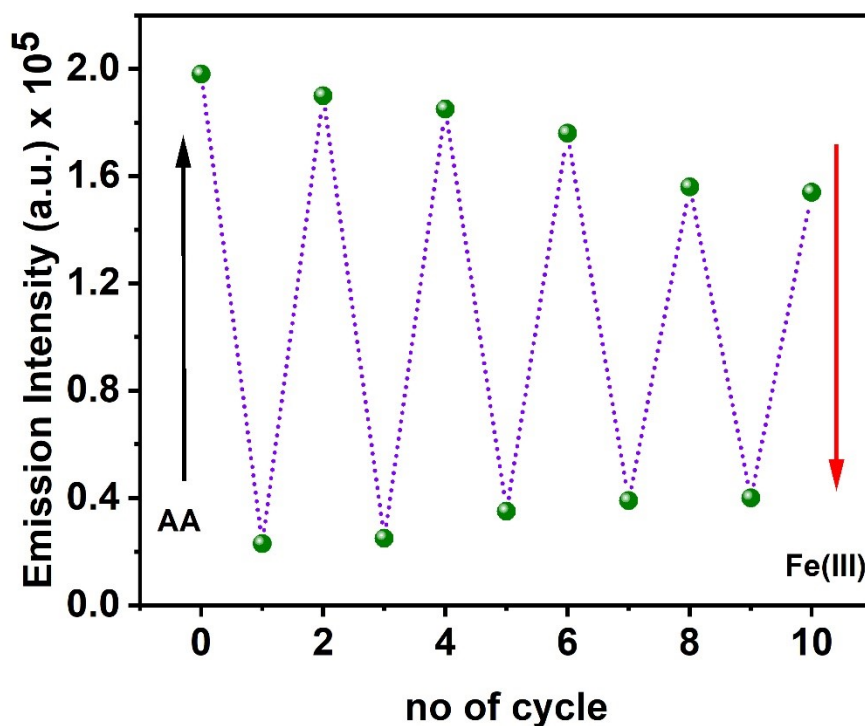

**Figure S12:** Reproducibility confirmation of CQDs/Fe(III) complex during detection of AA, which is monitored by the alternative addition of AA and Fe(III) in the CQDs/Fe solution.

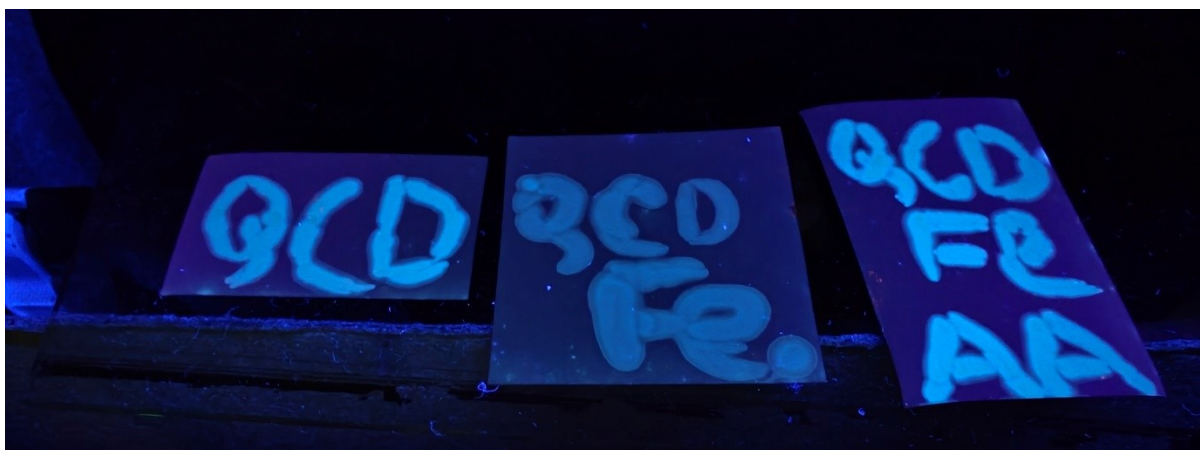

**Figure S13:** Detection of AA by CQDs/Fe(III) as paper strip (Left side only QCDs, middle QCDs +Fe(III) and right side QCDs +Fe(III))

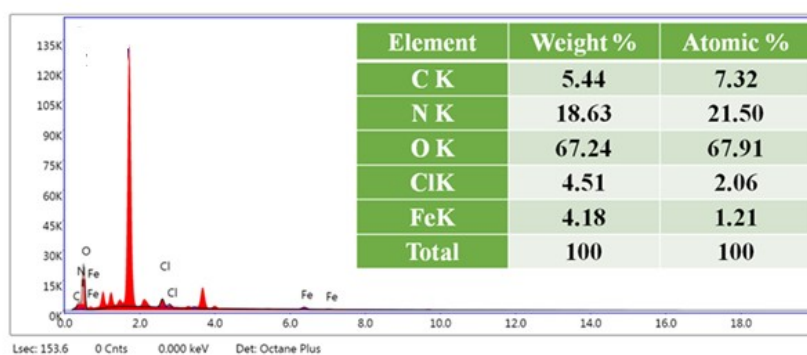

**Figure S14:** EDAX spectra of CQDs/Fe complex with their respective elements. [Inset: table of percentages of elements]

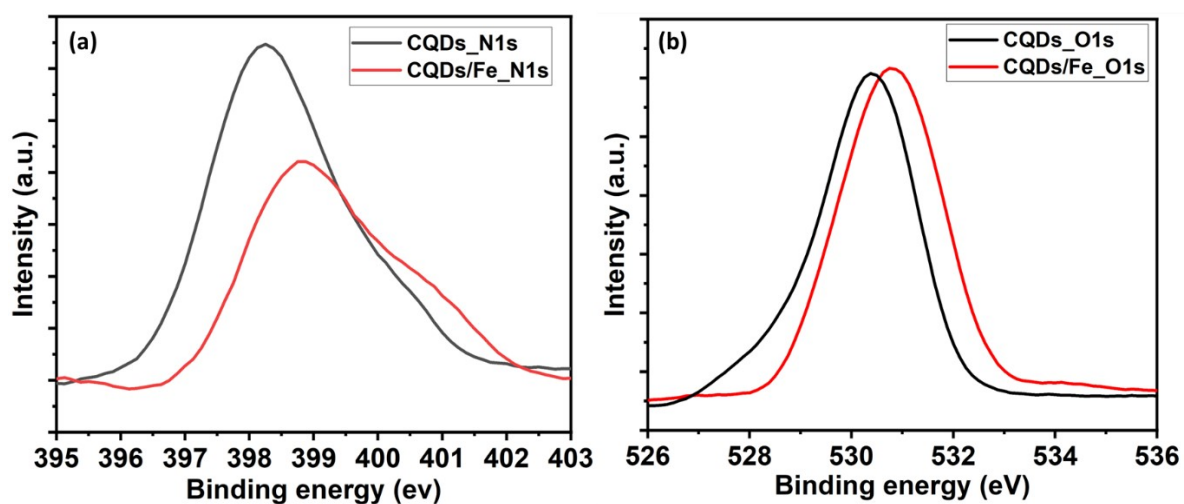

**Figure S15:** XPS graph (a) N1s and (b) O1s showing the of binding energy shifting of the donor atoms after coordination with the metal ion.

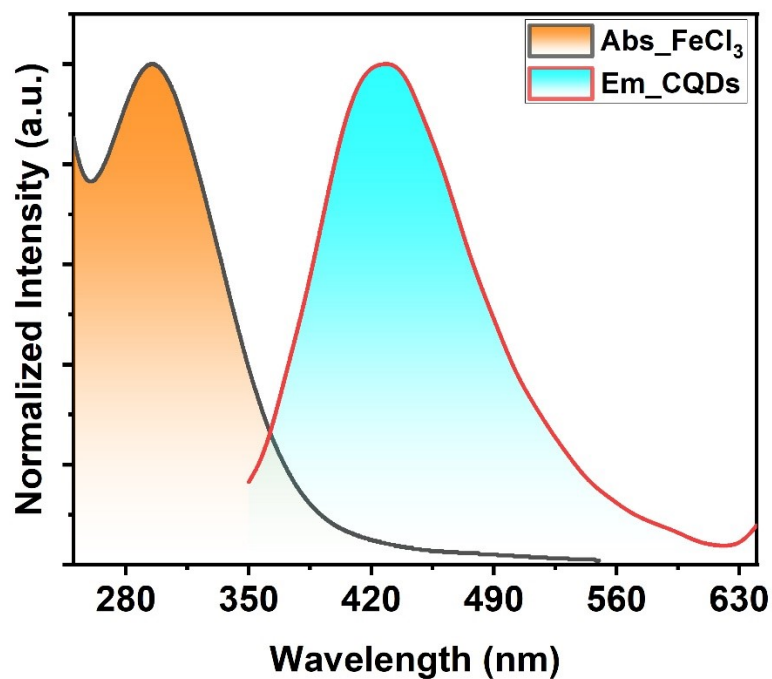

Figure S16: Spectral overlap between  $\text{FeCl}_3$  absorption and CQDs emission.

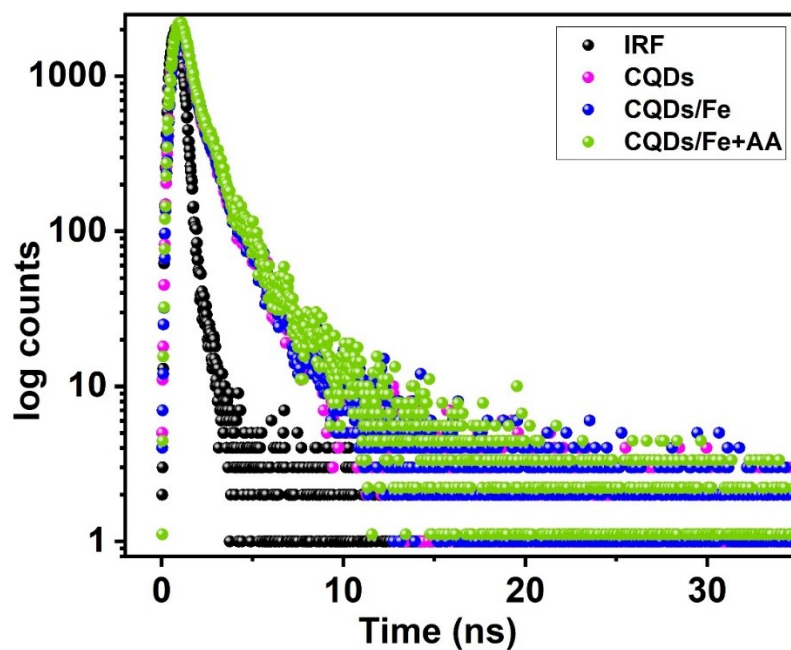

Figure S17: The fluorescence lifetime graph of the CQDs before and after the addition of  $\text{Fe(III)}$  and Ascorbic acid (AA).

**Table S1:** Fluorescence lifetime decay table

| sample     | $\alpha_1$ | $\alpha_2$ | $\tau_1$ | $\tau_2$ | $\tau_{av}$ | $\chi^2$ |
|------------|------------|------------|----------|----------|-------------|----------|
| CQDs       | 0.76       | 0.24       | 2.99     | 1.65     | 2.66        | 1.02     |
| CQDs/Fe    | 0.83       | 0.17       | 2.57     | 1.42     | 2.37        | 1.24     |
| CQDs/Fe+AA | 0.82       | 0.18       | 2.86     | 1.45     | 2.60        | 1.18     |

Normal daylight

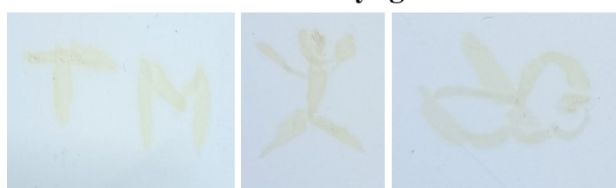

Under UV light ( $\lambda_{max} = 365 \text{ nm}$ )

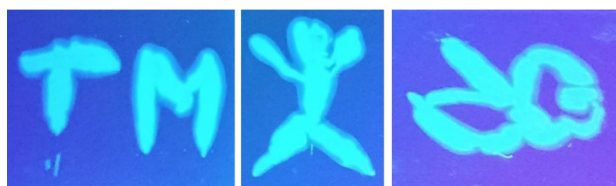

**Figure S18:** Calligraphy works drawing using the CQDs solution as fluorescent ink.
